# Supplementary material for: Genome-wide association study of agronomic traits in rice cultivated in temperate regions
Source: BMC Genomics. 2018 Sep 25;19:706. doi: 10.1186/s12864-018-5086-y (PMC6156875; doi:10.1186/s12864-018-5086-y)
Supplement: Supplementary file 4 — Table S2. Mean phenotypic values of cultivars carrying different alleles in the significant associated markers. (XLSX 16 kb) [file 12864_2018_5086_MOESM4_ESM.xlsx]

## Sheet: S2Table
Table S2.- Mean phenotypic values of cultivars carrying different alleles in the significant associated markers.
Trait	Marker	Genotype	Mean	SD
Height (cm)	H-1	AA	121.14	20.26
		GG	105.27	17.71
	H-2	AA	98	11.66
		GG	108.94	19.43
Days to heading	DH-1	AA	68.18	6.05
		GA	75.12	8.42
		GG	99.25	0.35
	DH-2	AA	88.83	13.54
		CC	71.87	8.4
	DH-3	AA	67	7.91
		GG	73.31	9.34
	DH-4	AA	71.57	9.99
		GG	73.61	8.72
	DH-5	AA	72.6299	8.68866
		GA	77.25	NA
		GG	72.6441	10.4664
	DH-6	AA	73.18	8.82
		GG	71.56	10.43
	DH-7	AA	67.84	6.37
		GA	77.25	NA
		GG	75.21	9.75
	DH-8	AA	71.52	7.63
		TT	76.74	13.27
	DH-9	AA	69.59	9.95
		GG	72.94	9.29
Panicle length (cm)	PL-1	CC	22.21	2.13
		GG	19.05	3.07
Panicle length	PL-2	AA	21.39	1.48
		GG	20.07	3.23
Panicle length	PL-3	AA	21.2	2.79
		CC	19.77	3.21
Panicle length	PL-4	AA	19.29	2.75
		GA	22.86	NA
		GG	20.3	3.2
Panicle length	PL-5	AA	19.36	2.72
		GA	22.86	NA
		GG	19.78	3.1
Panicle length	PL-6	AA	21.17	2.75
		GG	19.7	3.23
Panicle length	PL-7	AA	20.22	3.14
		GG	19.82	3.26
Panicle length	PL-8	AA	18.36	2.85
		GG	21.53	2.65
Panicle length	PL-9	AA	21.35	2.58
		GG	17.19	2.4
Panicle length	PL-10	AA	21.51	2.61
		CA	22.86	NA
		CC	19.67	3.2
Panicle length	PL-11	AA	22.67	2.42
		GA	24.27	3.47
		GG	19.79	2.97
Panicle length	PL-12	AA	17.7	3.02
		GA	22.67	0.27
		GG	20.87	2.82
Panicle length	PL-13	AA	20.94	3.15
		CC	19.87	3.12
Panicle length	PL-14	AA	22.6	3.48
		GA	22.86	NA
		GG	19.99	3.07
Grains per panicle	GN-1	GG	96.9641	33.8013
Grains per panicle	chr01_39875933	AA	75.325	23.4133
Grains per panicle	GN-2	AA	70.4479	26.1274
Grains per panicle	chr01_40012174	CC	94.8014	32.6819
Grains per panicle	GN-3	GG	70.9079	26.9644
Grains per panicle	chr02_2720687	AA	94.0382	32.7323
Grains per panicle	GN-4	GG	83.9008	26.4182
Grains per panicle	chr02_3755851	AA	114.872	39.0188
Grains per panicle	GN-5	GG	87.3347	28.2695
Grains per panicle	chr02_32500801	AA	139.461	42.5101
Grains per panicle	chr02_32500801	GA	87.5	NA
Grains per panicle	GN-6	CC	87.5238	28.5448
Grains per panicle	chr02_34386360	GG	140.742	40.9438
Grains per panicle	GN-7	CC	86.0016	27.0471
Grains per panicle	chr03_17999538	AA	129.501	42.4853
Grains per panicle	GN-8	AA	85.6502	26.7496
Grains per panicle	chr02_34386360	GG	130.044	41.719
Grains per panicle	GN-9	AA	85.6502	26.7496
Grains per panicle	chr03_17999538	GG	130.044	41.719
Grains per panicle	GN-10	CC	85.6502	26.7496
Grains per panicle	chr03_18500293	GG	130.044	41.719
Grains per panicle	GN-11	AA	85.6502	26.7496
Grains per panicle	chr03_19125149	GG	130.044	41.719
Grains per panicle	GN-12	AA	85.601	27.4521
Grains per panicle	chr03_20500343	TT	106.379	39.793
Grains per panicle	GN-13	GG	85.5254	27.0593
Grains per panicle	chr03_20875010	AA	108.623	40.8474
Grains per panicle	GN-14	AA	87.245	28.3198
Grains per panicle	chr05_6499710	GG	129.794	44.2734
Grains per panicle	chr05_6499710	GA	87.5	NA
Grains per panicle	GN-15	AA	90.1336	32.2413
Grains per panicle	chr09_9375311	GG	117.625	33.9271
Grains per panicle	GN-16	CC	88.0306	29.2867
Grains per panicle	chr11_15123344	GG	142.029	38.8431
Number of panicles	NP-1	AA	24.76	6.99
		GG	28.65	5.69
Number of panicles	NP-2	AA	19.75	5.15
		GG	26.44	6.73
