# Supplementary material for: Genome-wide association study of agronomic traits in rice cultivated in temperate regions
Source: BMC Genomics. 2018 Sep 25;19:706. doi: 10.1186/s12864-018-5086-y (PMC6156875; doi:10.1186/s12864-018-5086-y)
Supplement: Supplementary file 5 — Table S4. PCA. Proportion of the total and cumulative proportion of each principal component. (XLSX 16 kb) [file 12864_2018_5086_MOESM5_ESM.xlsx]

## Sheet: Eigenvalues_948_SInIndica
Table S4.-
PC	eigenvalue	proportion of total	cumulative proportion
0	36.1215	0.2286	0.2286
1	12.3882	0.0784	0.307
2	8.41668	0.05327	0.36027
3	7.16903	0.04537	0.40564
4	5.61289	0.03552	0.44116
5	4.45192	0.02817	0.46933
6	3.59194	0.02273	0.49206
7	3.15772	0.01998	0.51205
8	2.94993	0.01867	0.53072
9	2.44843	0.0155	0.54621
10	2.2045	0.01395	0.56016
11	2.07247	0.01312	0.57328
12	1.90971	0.01209	0.58537
13	1.84242	0.01166	0.59703
14	1.70009	0.01076	0.60779
15	1.67043	0.01057	0.61836
16	1.52823	0.00967	0.62803
17	1.45883	0.00923	0.63726
18	1.44442	0.00914	0.6464
19	1.32809	0.00841	0.65481
20	1.28817	0.00815	0.66296
21	1.27472	0.00807	0.67103
22	1.25302	0.00793	0.67896
23	1.19657	0.00757	0.68653
24	1.13073	0.00716	0.69369
25	1.09076	0.0069	0.70059
26	1.07458	0.0068	0.70739
27	1.05589	0.00668	0.71407
28	0.98886	0.00626	0.72033
29	0.97973	0.0062	0.72653
30	0.9455	0.00598	0.73251
31	0.92232	0.00584	0.73835
32	0.90206	0.00571	0.74406
33	0.86969	0.0055	0.74956
34	0.86231	0.00546	0.75502
35	0.85003	0.00538	0.7604
36	0.83958	0.00531	0.76571
37	0.77537	0.00491	0.77062
38	0.76397	0.00483	0.77546
39	0.74823	0.00474	0.78019
40	0.71917	0.00455	0.78474
41	0.70368	0.00445	0.7892
42	0.69424	0.00439	0.79359
43	0.67203	0.00425	0.79784
44	0.66452	0.00421	0.80205
45	0.6463	0.00409	0.80614
46	0.63572	0.00402	0.81016
47	0.61891	0.00392	0.81408
48	0.61083	0.00387	0.81794
49	0.59151	0.00374	0.82169
50	0.57873	0.00366	0.82535
51	0.57208	0.00362	0.82897
52	0.55293	0.0035	0.83247
53	0.54567	0.00345	0.83592
54	0.53926	0.00341	0.83934
55	0.52539	0.00333	0.84266
56	0.51731	0.00327	0.84593
57	0.51471	0.00326	0.84919
58	0.49297	0.00312	0.85231
59	0.48837	0.00309	0.8554
60	0.47529	0.00301	0.85841
61	0.47207	0.00299	0.8614
62	0.46263	0.00293	0.86433
63	0.45679	0.00289	0.86722
64	0.44438	0.00281	0.87003
65	0.43534	0.00276	0.87278
66	0.43063	0.00273	0.87551
67	0.42135	0.00267	0.87818
68	0.41776	0.00264	0.88082
69	0.40437	0.00256	0.88338
70	0.40614	0.00257	0.88595
71	0.39661	0.00251	0.88846
72	0.39291	0.00249	0.89095
73	0.38106	0.00241	0.89336
74	0.37468	0.00237	0.89573
75	0.37014	0.00234	0.89807
76	0.36125	0.00229	0.90036
77	0.34922	0.00221	0.90257
78	0.35151	0.00222	0.90479
79	0.34591	0.00219	0.90698
80	0.33638	0.00213	0.90911
81	0.32967	0.00209	0.9112
82	0.32301	0.00204	0.91324
83	0.32193	0.00204	0.91528
84	0.31168	0.00197	0.91725
85	0.30421	0.00193	0.91918
86	0.29825	0.00189	0.92106
87	0.29933	0.00189	0.92296
88	0.2919	0.00185	0.9248
89	0.28638	0.00181	0.92662
90	0.28162	0.00178	0.9284
91	0.27516	0.00174	0.93014
92	0.27397	0.00173	0.93187
93	0.26664	0.00169	0.93356
94	0.26264	0.00166	0.93522
95	0.26004	0.00165	0.93687
96	0.25625	0.00162	0.93849
97	0.25313	0.0016	0.94009
98	0.24811	0.00157	0.94166
99	0.00278	1.7581e-05	0.94168
100	0.00399	2.525e-05	0.94171
101	0.00665	4.2104e-05	0.94175
102	0.00923	5.8397e-05	0.94181
103	0.00877	5.5481e-05	0.94186
104	0.00094386	5.9734e-06	0.94187
105	0.01496	9.4647e-05	0.94196
106	0.00021311	1.3487e-06	0.94196
107	8.7989e-05	5.5685e-07	0.94197
108	0.0001129	7.1449e-07	0.94197
109	0.00012735	8.0598e-07	0.94197
110	0.0191	0.0001209	0.94209
111	0.02334	0.00014769	0.94224
112	0.02417	0.00015295	0.94239
113	0.24134	0.00153	0.94392
114	0.23628	0.0015	0.94541
115	0.23329	0.00148	0.94689
116	0.02897	0.00018336	0.94707
117	0.03077	0.00019474	0.94727
118	0.03663	0.00023183	0.9475
119	0.03589	0.00022711	0.94772
120	0.04093	0.00025903	0.94798
121	0.04172	0.00026404	0.94825
122	0.22507	0.00142	0.94967
123	0.22194	0.0014	0.95108
124	0.21863	0.00138	0.95246
125	0.21722	0.00137	0.95383
126	0.21403	0.00135	0.95519
127	0.04479	0.00028343	0.95547
128	0.04785	0.00030283	0.95578
129	0.05046	0.00031932	0.95609
130	0.20798	0.00132	0.95741
131	0.05511	0.00034876	0.95776
132	0.20347	0.00129	0.95905
133	0.19888	0.00126	0.96031
134	0.06089	0.00038538	0.96069
135	0.06202	0.00039252	0.96108
136	0.06574	0.00041606	0.9615
137	0.06749	0.00042712	0.96193
138	0.06993	0.00044258	0.96237
139	0.07135	0.00045154	0.96282
140	0.07259	0.00045942	0.96328
141	0.07389	0.00046762	0.96375
142	0.07688	0.00048657	0.96423
143	0.07881	0.00049876	0.96473
144	0.1918	0.00121	0.96595
145	0.19311	0.00122	0.96717
146	0.08221	0.0005203	0.96769
147	0.1881	0.00119	0.96888
148	0.18492	0.00117	0.97005
149	0.18389	0.00116	0.97121
150	0.08582	0.00054312	0.97176
151	0.08917	0.00056433	0.97232
152	0.09244	0.00058501	0.97291
153	0.09391	0.00059433	0.9735
154	0.09509	0.00060181	0.9741
155	0.09637	0.00060988	0.97471
156	0.09757	0.00061747	0.97533
157	0.09949	0.00062965	0.97596
158	0.10276	0.00065035	0.97661
159	0.10527	0.00066623	0.97728
160	0.10641	0.00067342	0.97795
161	0.10872	0.00068804	0.97864
162	0.1126	0.00071262	0.97935
163	0.17852	0.00113	0.98048
164	0.17567	0.00111	0.98159
165	0.173	0.00109	0.98269
166	0.11778	0.0007454	0.98343
167	0.12176	0.00077057	0.9842
168	0.12219	0.0007733	0.98498
169	0.12678	0.00080236	0.98578
170	0.16826	0.00106	0.98684
171	0.1674	0.00106	0.9879
172	0.16344	0.00103	0.98894
173	0.16215	0.00103	0.98996
174	0.15721	0.00099489	0.99096
175	0.15495	0.00098064	0.99194
176	0.15571	0.0009854	0.99292
177	0.13227	0.00083707	0.99376
178	0.13422	0.00084941	0.99461
179	0.13549	0.00085746	0.99547
180	0.13791	0.00087277	0.99634
181	0.14717	0.00093137	0.99727
182	0.1468	0.00092906	0.9982
183	0.14217	0.00089977	0.9991
184	0.14204	0.00089889	1
185	5.6332e-30	3.565e-32	1
186	5.2452e-31	3.3195e-33	1
187	3.796e-31	2.4023e-33	1
188	2.9902e-31	1.8924e-33	1
189	2.5579e-31	1.6188e-33	1
190	2.0618e-31	1.3048e-33	1
191	4.0331e-32	2.5524e-34	1
192	2.75e-33	1.7404e-35	1
